# Supplementary material
Source: Springer Nature journal article supplement (https://www.springermedizin.de/resource/supplementary/12879_2005_260_MOESM6_ESM.pdf/9448300)

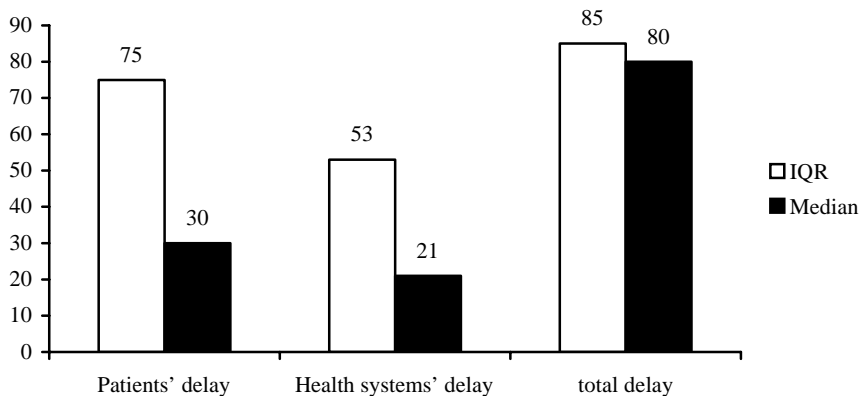

i

| Quartile | Patients' delay | Health systems' delay | Total delay |
|----------|-----------------|-----------------------|-------------|
| Q1       | 15              | 7                     | 44          |
| Q3       | 90              | 60                    | 129         |

Supplement: MOESM6 [file 9448300]
